# Supplementary material for: A Systematic Evaluation of Measures Against Highly Pathogenic Avian Influenza (HPAI) in Indonesia
Source: Front Vet Sci. 2019 Feb 18;6:33. doi: 10.3389/fvets.2019.00033 (PMC6387902; doi:10.3389/fvets.2019.00033)
Supplement: Supplementary file 1 [file Table_1.XLSX]

## Sheet: Inv. of diret-indirect measures
No.	Measures	Focus	Aim	Actors	Target of the program	Level of Policy	Years
1	Biosecurity	HPAI prevention (animals)	Prevention of the infection and spread of HPAI virus	farmers	poultry farms, slaughterhouses, wet market	flock/farm, market chain	2004-
2	Preventive vaccination		Prevention of HPAI infection during the wet season	farmers, govt.	sector 3 and 4 poultry farms	flock/farm	2006-
3	HPAI disease surveillance	Monitoring and Surveillance	Monitor the epidemiology and dynamics of AI viruses	govt., farmers	poultry farms	sub-district, district	2004-
4	HPAI surveillance on potential AI reservoir			govt.	wildlife, grazing ducks	flock/farm, sub-district, district, regional, national	2006-
5	Live Bird Market Surveillance			govt., IOs	traditional market chain	sub-district, district	2011-2015
6	Monitoring of the changes of AI virus, vaccine efficacy, and new seed strains			govt., IOs	poultry farms, market chain	sub-district, district	2006-
7	Monitoring the incidences and spread of HPAI disease through Geographical Information System		Establish a disease status of a village	govt.	sub-district, district	sub-district, district	2006-
8	Targeted Vaccination	HPAI control in animals	HPAI virus risk reduction/eradication	govt.	sector 4 poultry farms in endemic/high-prevalence of AI, regions with human-AI case, and/or areas with sector 1,2,3	flock/farm	2004-
9	Selective depopulation			govt., farmers	sector 3 and 4 poultry farms	flock/farm	2004-
10	Stamping-out			govt.	poultry farms	flock/farm	2004-2007
11	Poultry restocking (cleaning & disinfection)			farmers	poultry farms	flock/farm	2004-
12	Improving sanitation in farm areas, wet market, and traffic control			BO, Govt., IOs	market chain	market chain	2004-
13	Traffic control between regions & islands		Controlling the spread of diseases between islands & regions	govt.	live bird, poultry products, feed, waste	sub-district, district, regional, islands	2004-
14	Zoning and compartmentalization		To improve poultry health status through implementation of good breeding practices and good farming practices	govt.	sector 1 and 2 poultry farms; low AI prevalence sub-district & district	farm, sub-district, district	2008-
15	Provision of antiviral medicine	HPAI control (humans)	Management of Human cases of AI	Govt., IOs	High-risk groups	village, sub-district	2004-

## Sheet: Inv. supportive measures
No.	Measures	Focus	Aim	Actors	Target of the program	Level of Policy	Years
1	AI vaccine production	HPAI prevention & control	Supporting vaccination program	govt., private	virus	national	2003-
2	Provision of AI vaccines			govt.	sector 3 and 4 farms	sub-district, district	2004-
3	Provision of PPE and disinfectant		Supporting the improvement of sanitation	govt.			-
4	Development and improvement of animal health posts (Puskeswan)		Increasing surveillance & hospital capacity	govt.	animal health posts	sub-district, district	2006-
5	Development and improvement of the capability of animal health/diagnosis laboratories for AI virus detection and monitoring		Institutional strenghtening on national veterinary and quarantine service	govt.	regions with high population of poultry birds	district, regional, national
6	Provision of facilities and infrastructure for case handling in hospitals		Managing human cases according to standards	govt.	hospitals	district, regional
7	Strengthening the function of Community Health Centers (Puskesmas) in surveillance, socialization, case discovery and AI reference system			govt.	Puskesmas	sub-district
8	Provision of vehicles, equipment, tools		Supporting monitoring activities	Ios, govt.	local livestock services, central animal health service	sub-district, district, central	2006-2014
9	Recruitment and training of field veterinary service officers	Strengthening veterinary services	Increasing field veterinary services capacity and capability	govt.	sector 2, 3, and 4 farmers	sub-district, district	2006-
10	Recruitment and training for quarantine personnel			govt.	-	sub-district, district, regional, national
11	Training healthcare workers	Strengthening human health services	Managing human cases according to standards	govt., IOs	healthcare workers	sub-distric, district, regional, national
12	Knowledge support for farmers on prevention, monitoring, and control measures	Public Private Partnership	Strengthen and expand Public Private Partnership to improve biosecurity and Good Farming Practices (GFP)	govt., private	sector 3 and 4 farmers	farmers/workers
13	Good Farming Practices (GFP)			govt., private	sector 2, 3, and 4 farmers	farmers/workers
14	collaboration with laboratories		Strengthening research network and capability on AI virus monitoring	govt., IOs	sector 3 and 4 farmers	farmers/workers
15	Training on local communities on prevention and control of HPAI	Risk communication, information and public awareness	Increasing public awareness, particularly in high-risk districts & Protection of high-risk groups	govt., IOs	sector 3 and 4 farmers, communities	sub-district, district	2006-2011
16	Public communication of AI risks, symptomps, prevention			govt., IOs	communities	national	2004-2008
17	Research actions on AI and its prevention, monitoring, and control measures	Research and Development	Developing programs and activities of AI control in Indonesia	govt., RI, HE, IOs	vaccination program	regional	2007-2009
18	Presidential decree, ministry regulation, local government regulations	Laws/Legislation	legal basis for every actions and programs	govt.	all strategies, programs, and activities	district, regional, national	2004-
19	Monitoring of HPAI controla ctivities, evaluation and regular reporting on AI case/incicdence and control development	Monitoring and Evaluation	monitor and evaluate programs	govt.	all strategies, programs, and activities	regional, national
